# Supplementary material
Source: publisher site journal article supplement (https://www.kjim.org/upload/media/kjim-2025-171-Supplementary-Table-3.pdf)
Supplement: Supplementary file 1 [file kjim-2025-171-Supplementary-Table-3.pdf]

**Supplementary Table 3. Baseline characteristics for the full cohort of South Korea**

| Characteristic                | South Korea (n = 2,207,784) |
|-------------------------------|-----------------------------|
| Mean age (yr)                 | 61.79 ± 3.61                |
| Age (yr)                      |                             |
| 50–54                         | 62,039 (2.81)               |
| 55–59                         | 530,089 (24.01)             |
| 60–64                         | 1,054,658 (47.77)           |
| ≥ 65                          | 560,998 (25.41)             |
| Sex                           |                             |
| Male                          | 1,018,230 (46.12)           |
| Female                        | 1,189,554 (53.88)           |
| Region of residence           |                             |
| Urban                         | 1,179,177 (53.41)           |
| Rural                         | 1,028,657 (46.59)           |
| Household income              |                             |
| Low (0th–39th percentile)     | 652,621 (29.56)             |
| Middle (40th–79th percentile) | 808,491 (36.62)             |
| High (80th–100th percentile)  | 746,452 (33.81)             |

Values are presented as mean ± standard deviation or number (%).
